# Supplementary material
Source: PubMed Central journal article supplement (PMC8204337)
Supplement: mmc1.pdf [file mmc1.pdf]

**Biophysical Journal, Volume 120**

**Supplemental information**

**Matrix-driven changes in metabolism support cytoskeletal activity to promote cell migration**

**Yusheng Wu, Matthew R. Zanutelli, Jian Zhang, and Cynthia A. Reinhart-King**

## Supplemental figures.

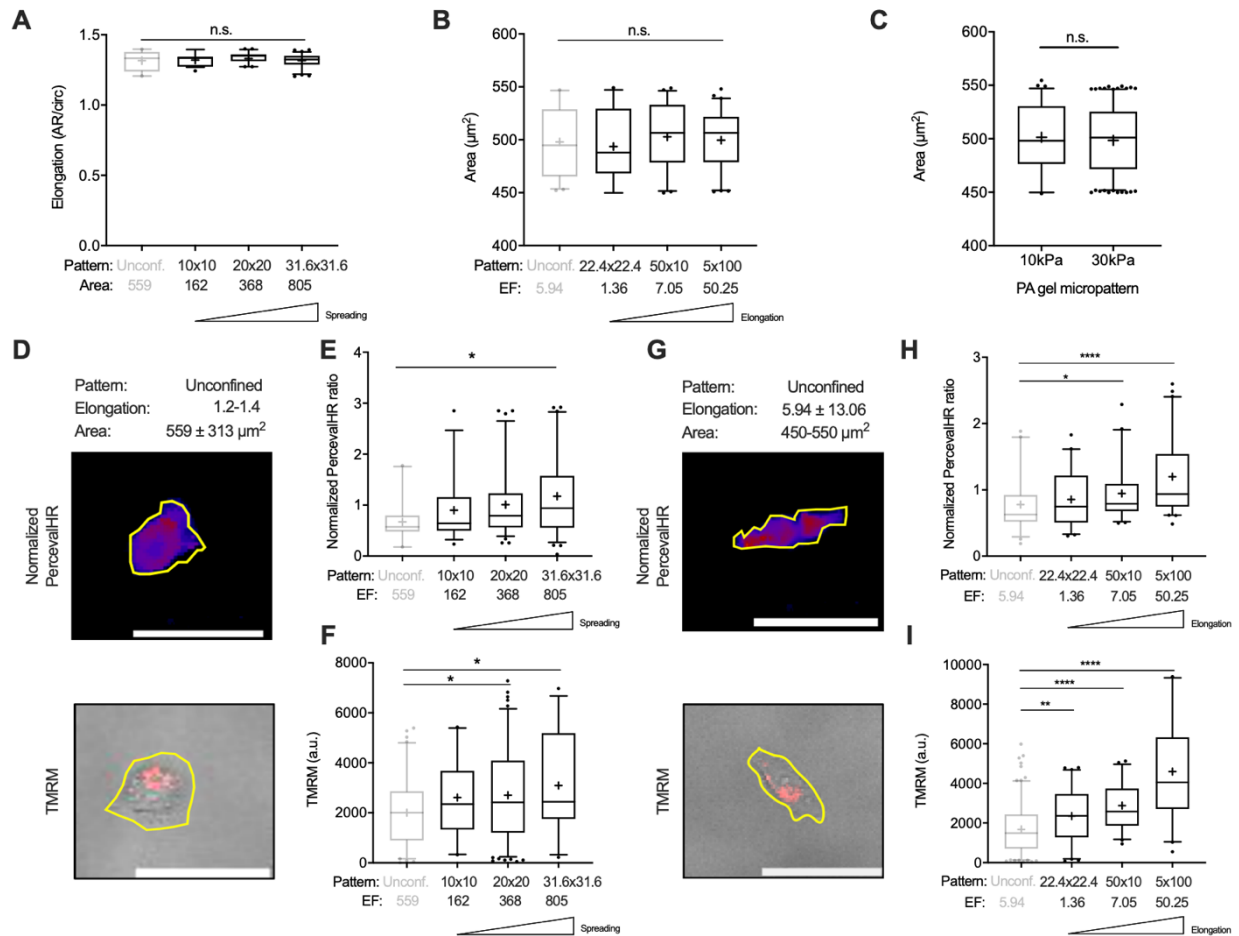

**Supplemental Figure 1. Controlling for cell area/elongation and cell confinement across micropattern shapes.** Maintaining (A) cell elongation factor across micropattern shape with varying cell area for quantification of MDA-MB-231 PercevalHR signal ( $n = 20-76$  cells) and (B) cell area across micropattern shape with varying cell elongation ( $n = 50-64$  cells). (C) Maintaining cell area across all micropattern shapes of varying gel stiffness ( $n > 100$  cells). (D) Normalized PercevalHR ratio and TMRM fluorescence intensity for MDA-MB-231 cells unconfined on collagen micropatterns. Quantification of (E) normalized PercevalHR ratio ( $n = 36-76$  cells) and (F) mitochondrial membrane potential via TMRM ( $n = 30-155$  cells) for cells with increasing spreading. (G) Normalized PercevalHR ratio and TMRM fluorescence intensity for MDA-MB-231 cells unconfined on collagen micropatterns. (H) Quantification of normalized PercevalHR ( $n = 55-64$  cells) and (I) TMRM for cells with increasing elongation ( $n = 40-62$  cells). Data shown as box-and-whisker plots denote mean (+), medians and 25th/75th and 5th/95th percentiles, gray as unconfined and black as patterns; yellow lines show cell outlines. n.s.= non-significant, \* $P < 0.05$ , \*\* $P < 0.01$ , \*\*\*\* $P < 0.0001$  with one-way ANOVA. Scale bar = 50  $\mu\text{m}$ .

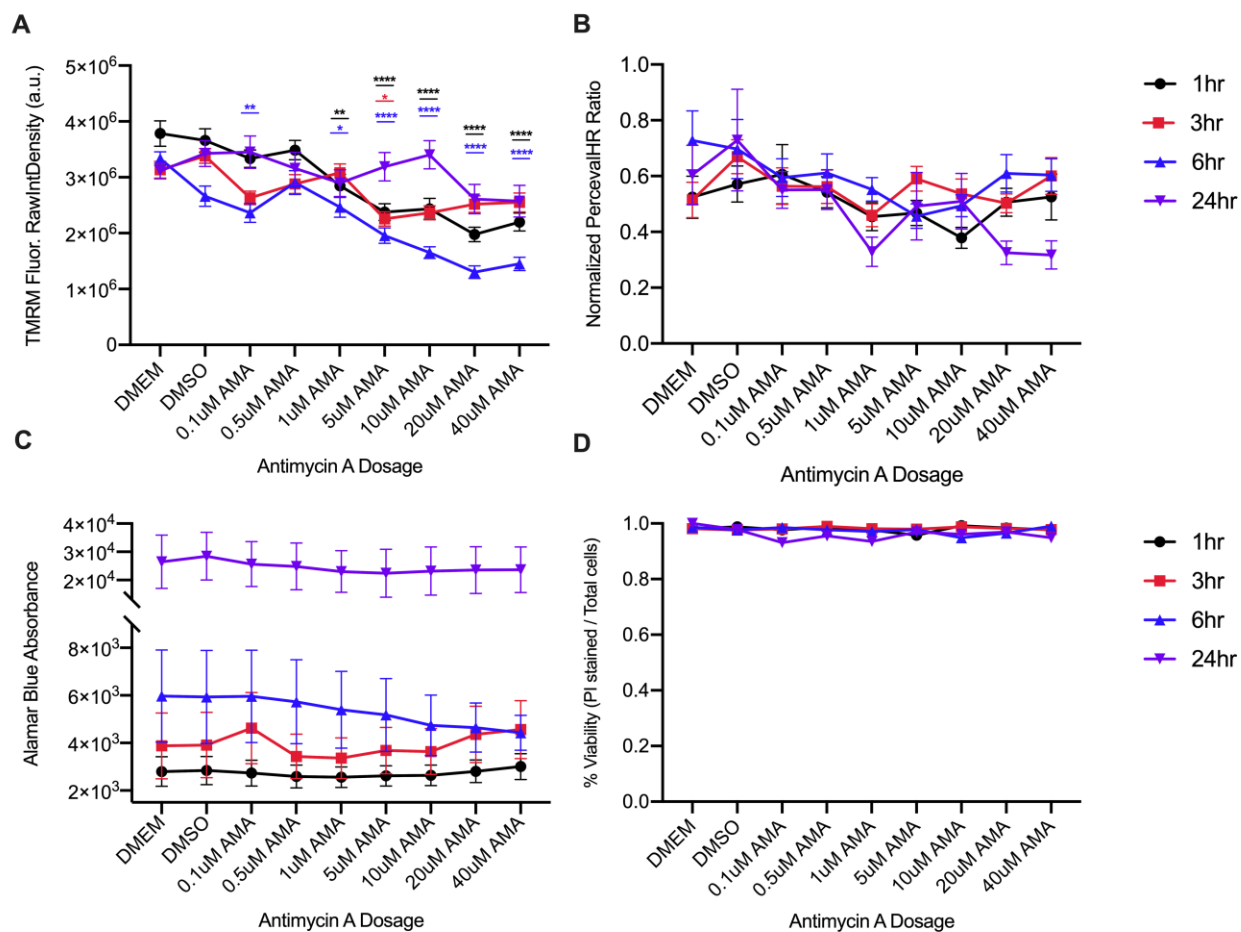

**Supplemental Figure 2. OXPPOS inhibition across AMA concentrations.** Quantification of (A) mitochondria membrane potential via TMRM integrated fluorescence intensity, (B) normalized PercevalHR ratio, (C) metabolic activity via AlamarBlue fluorescent intensity, and (D) cell viability (propidium iodide (PI) / Hoechst) for 1, 3, 6, and 24 h of treatment with 0.1–40  $\mu$ M AMA ( $n > 30$  cells). Data shown as mean  $\pm$  s.e.m., \* $P < 0.05$ , \*\* $P < 0.01$ , \*\*\*\* $P < 0.0001$  with one-way ANOVA.

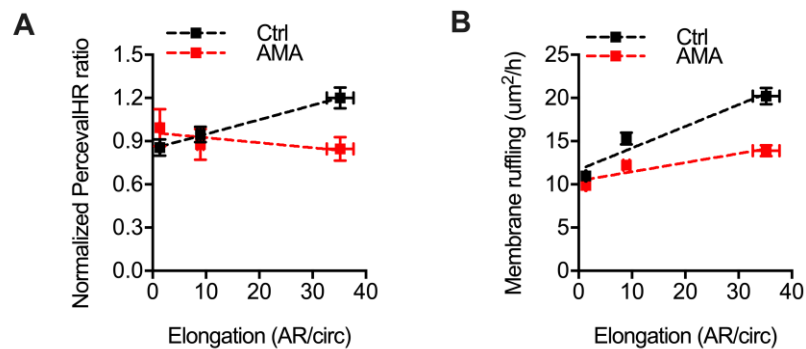

**Supplemental Figure 3. OXPPOS impacts intracellular ATP:ADP ratio and membrane ruffling during 2D elongation.** (A) Normalized PercevalHR ratio ( $n = 55-64$  cells) and (B) membrane ruffling ( $n = 30-35$  cells) following AMA treatment on collagen micropatterns with increasing elongation. Data shown as mean  $\pm$  s.e.m.; dashed lines show linear regression.

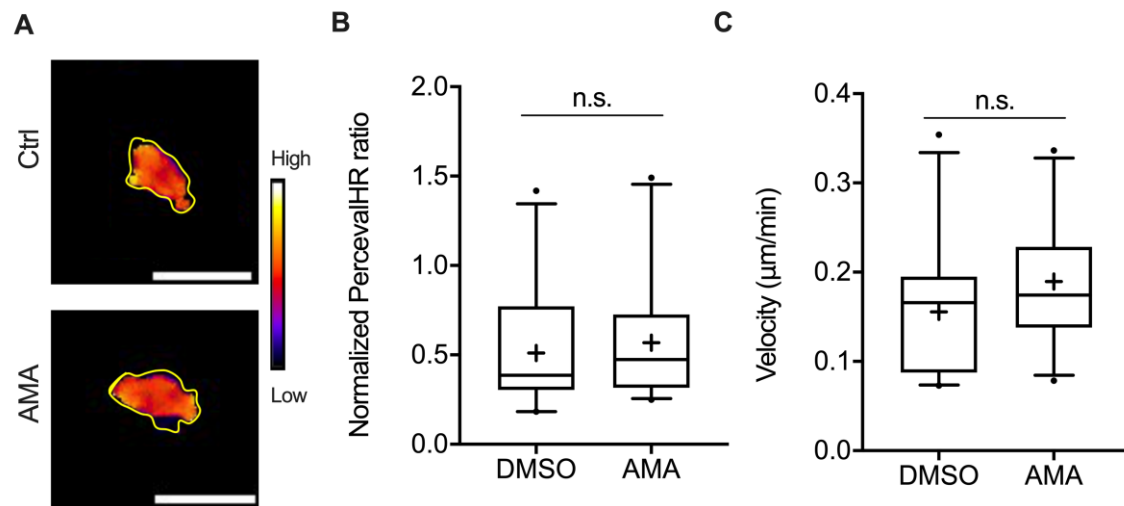

**Supplemental Figure 4. OXPPOS inhibition does not influence 2D migration.** (A) Normalized PercevalHR ratio of MDA-MB-231 cells following AMA treatment on 2D glass surface. Quantification of (B) Normalized PercevalHR ratio and (C) stepwise velocity after AMA treatment in for 2D migration ( $n > 20$  cells). Data shown as box-and-whisker plots denote mean (+), medians and 25th/75th and 5th/95th percentiles; yellow lines show cell outlines; n.s.= not significant with two tailed t-test. Scale bar = 50  $\mu\text{m}$ .

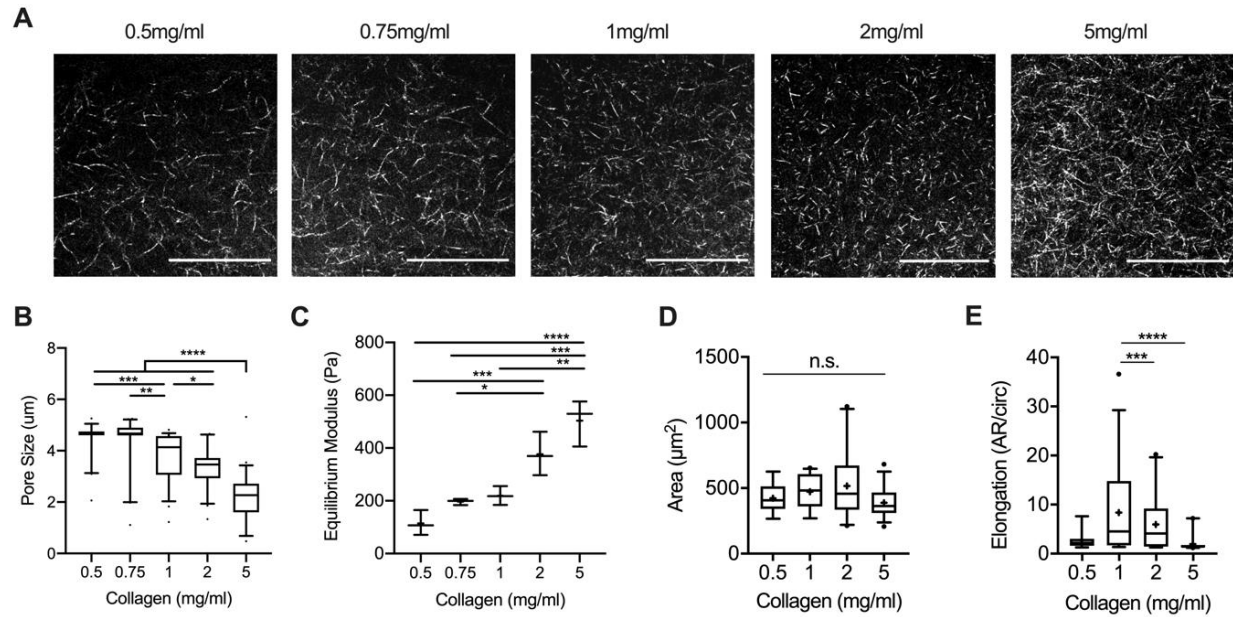

**Supplemental Figure 5. MDA-MB-231 cell morphology as a function of 3D collagen density with mechanical characterization.** (A) Confocal reflectance images of collagen matrices with varying density. Quantification of (B) pore size and (C) equilibrium modulus of collagen gels with varying density ( $n = 3$  gels). Quantification of (D) cell area and (E) cell elongation factor ( $n = 16-33$  cells) in matrices with increasing collagen density. Data shown as box-and-whisker plots denote mean (+), medians and 25th/75th and 5th/95th percentiles; multiple comparisons with ANOVA, n.s. = not significant, \* $P < 0.05$ , \*\* $P < 0.01$ , \*\*\* $P < 0.001$ , \*\*\*\* $P < 0.0001$ . Scale bar =  $50 \mu\text{m}$ .

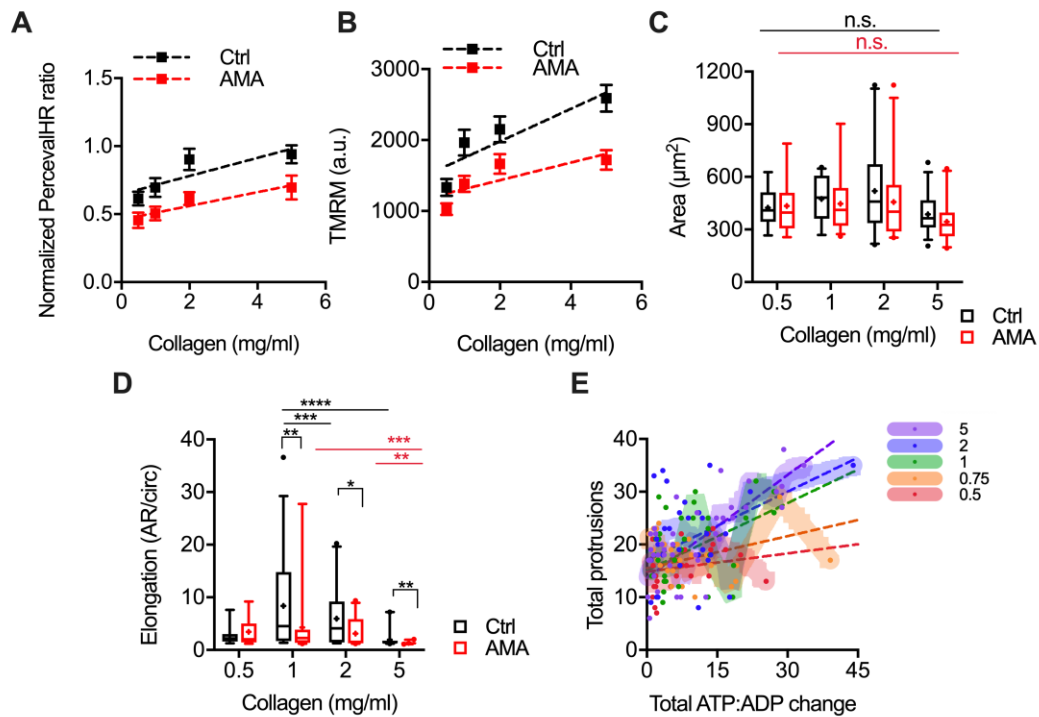

**Supplemental Figure 6. OXPPOS inhibition impacts morphology and cellular energetics which correlates with protrusions.** Linear correlation of collagen density (0.5, 1, 2, and 5mg/ml) with (A) normalized PercevalHR ratio ( $n = 32-61$  cells) and (B) TMRM fluorescent signal ( $n = 42-93$  cells) following AMA treatment. Quantification of (C) cell area and (D) cell elongation factor ( $n = 13-33$  cells) in matrices of increasing collagen densities. (E) Total number of new protrusions and total ATP:ADP change of single MDA-MB-231 cell in collagen matrices ( $n = 30-40$  cells). Data shown as box-and-whisker plots denote mean (+), medians and 25th/75th and 5th/95th percentiles, or mean  $\pm$  s.e.m.; two-tailed t-test when comparing between ctrl and AMA, multiple comparisons with ANOVA when comparing across densities; lines show LOWESS smoothing and dashed lines show linear regression. n.s. = not significant, \*\* $P < 0.01$ , \*\*\* $P < 0.001$ , \*\*\*\* $P < 0.0001$ .

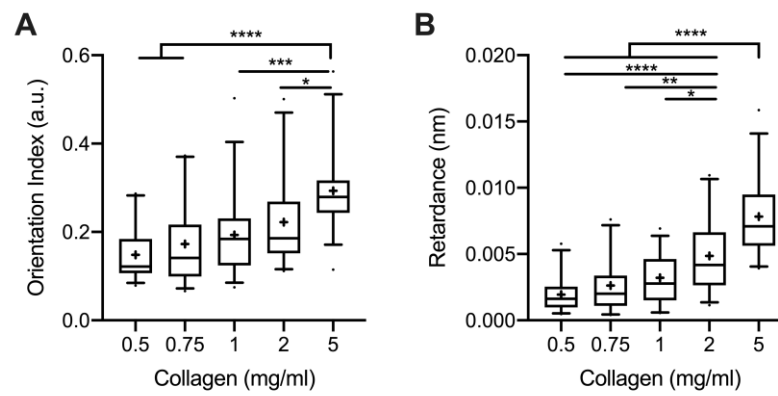

**Supplemental Figure 7. Matrix remodeling and cell contractility increases with collagen density.** Quantification of (A) collagen fiber orientation within 10 $\mu$ m to cell protrusions and (B) cell contractility for MDA-MB-231 cells in matrices of increasing collagen density. \*P < 0.05, \*\*P < 0.01, \*\*\*P < 0.001, \*\*\*\*P < 0.0001 with one-way ANOVA.
